# Supplementary material
Source: publisher figshare collection journal article supplement (https://acs.figshare.com/ndownloader/files/4027936)
Supplement: Supplementary file 1 [file 4027936]

## Supporting Information

# Synthesis of p-type semiconducting phenothiazine exfoliatable layered crystal

*Minkyung Lee, Ji Eun Park, Chibeom Park and Hee Cheul Choi \**

Department of Chemistry, Pohang University of Science and Technology (POSTECH), San 31,  
Hyoja-Dong, Nam-Gu, Pohang, 790-784, Korea.

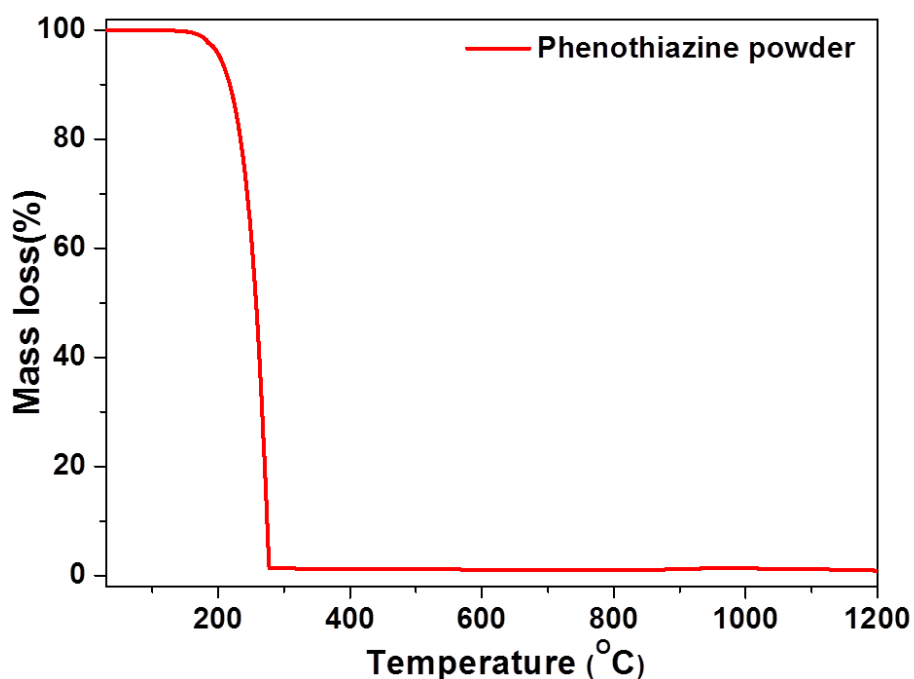

**Figure S1.** Thermogravimetric analysis (TGA) data of PTZ powder showing vaporization of PTZ powder starting at around 180 °C.

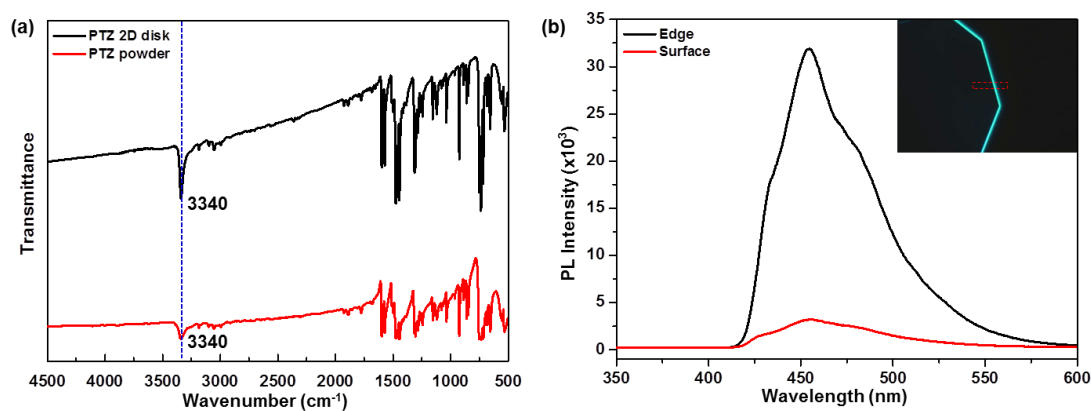

**Figure S2.** (a) FTIR spectra of PTZ powder (red line) and crystal (black line). Blue dotted line at  $3340\text{ cm}^{-1}$  indicates N-H stretching vibration. (b) PL spectra of edge emission (black) and surface emission (red) of a PTZ crystal. Inset is a fluorescence microscope image showing dominant luminescence from the edges of the PTZ crystal ( $\lambda_{\text{ex}} = 330 - 380\text{ nm}$ ,  $\lambda_{\text{em}} = 420\text{ nm}$  long-pass filter, exposure time = 0.4 s).

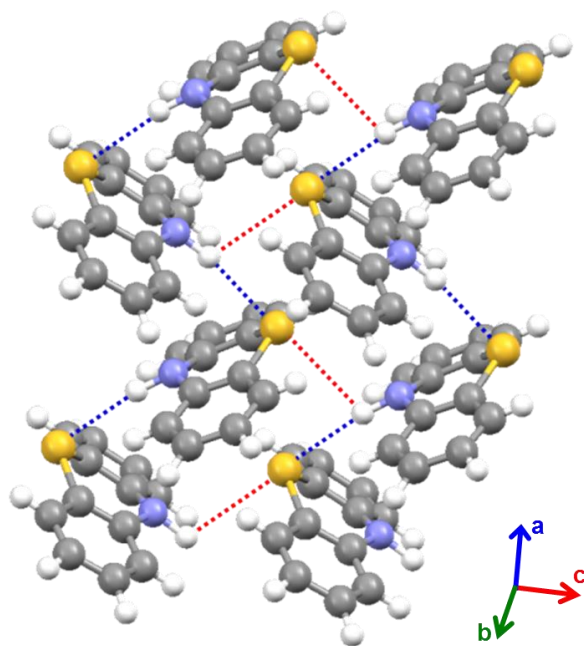

**Figure S3.** Packing of PTZ molecules on (020) plane.

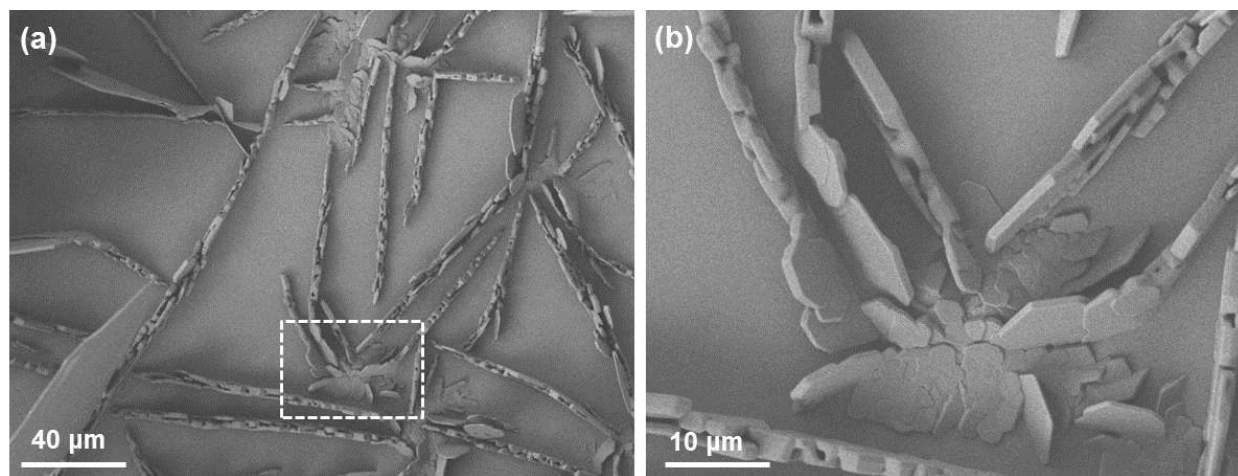

**Figure S4.** (a) SEM image of PTZ crystals taken after 5 min of reaction. (b) Magnified view of the boxed region in (a).

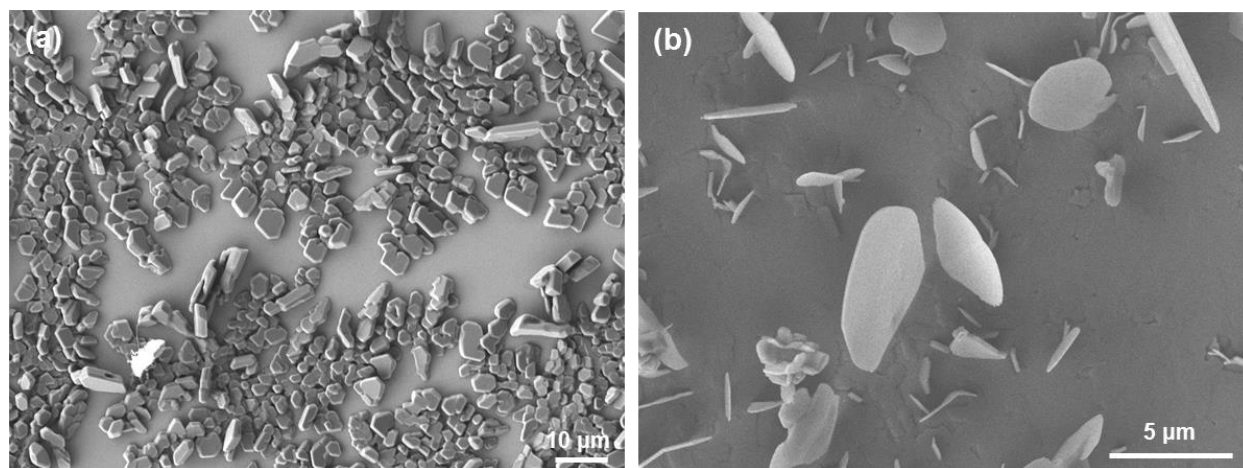

**Figure S5.** SEM images of (a) anthracene crystals, and (b) pentacene crystals.

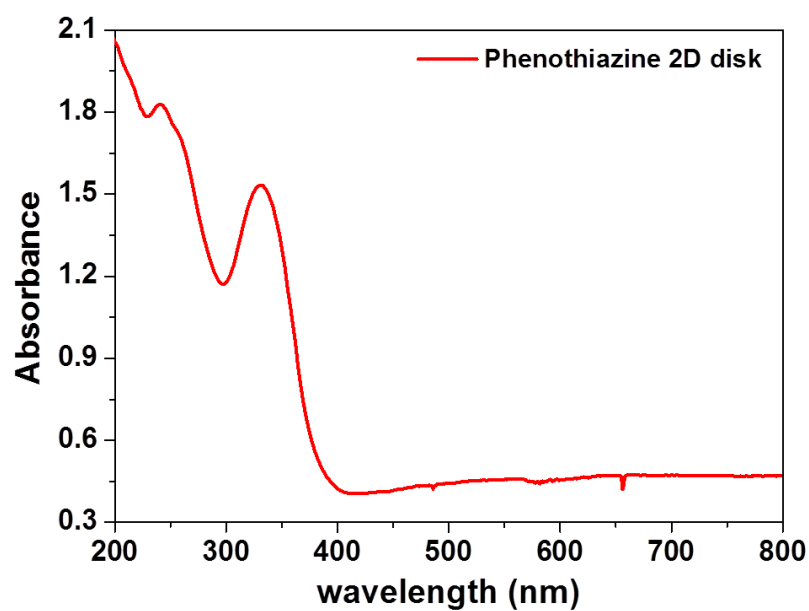

**Figure S6.** Absorption spectrum of PTZ crystals showing two distinct absorptions at 242 and 330 nm.

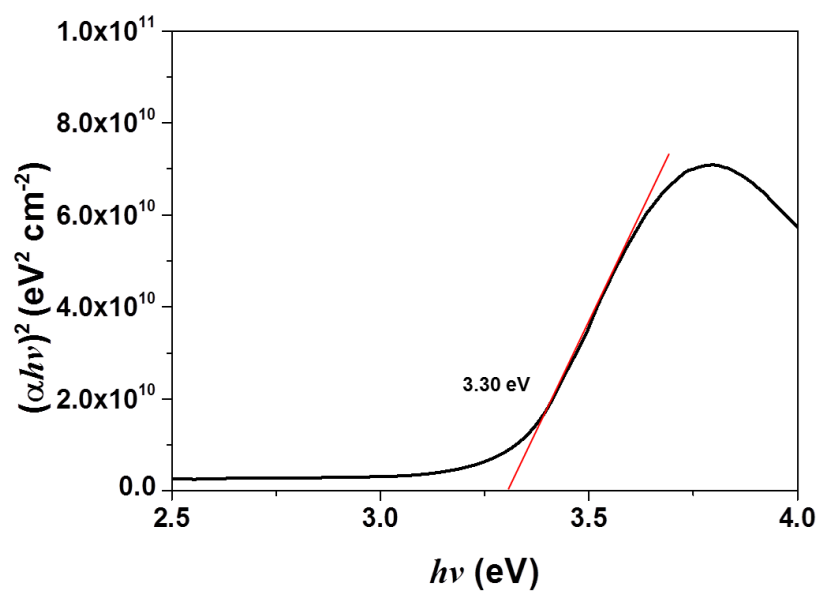

**Figure S7.** Plot of  $(\alpha h\nu)^2$  versus  $h\nu$  for PTZ disk crystal.

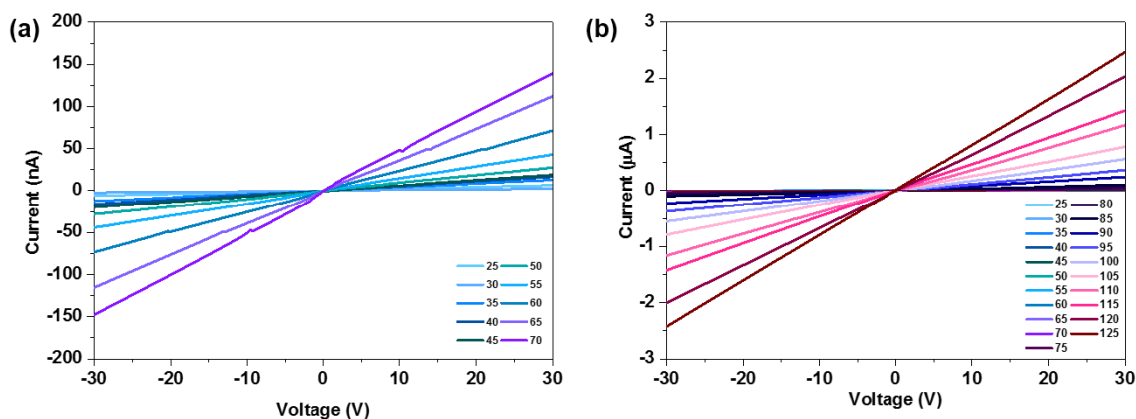

**Figure S8.** (a)  $I_{DS}$ - $V_{DS}$  curves from a PTZ single crystal FET device measured at temperatures from 25 to 70 °C. (b)  $I_{DS}$ - $V_{DS}$  curves from PTZ powder pellet device measured at temperatures from 25 to 125 °C.

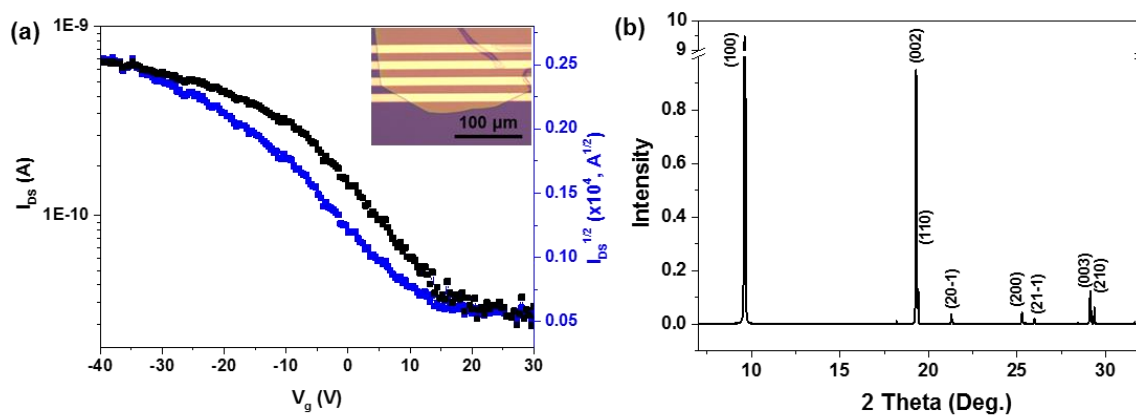

**Figure S9.** (a)  $I_{DS}$ - $V_G$  curve of anthracene 2D crystal FET device showing carrier mobility of  $1.69 \times 10^{-6} \text{ cm}^2/\text{V}\cdot\text{s}$  (length/width ratio = 0.5,  $V_{DS} = 40 \text{ V}$ ). (b) XRD data of anthracene crystals
